# Supplementary material
Source: PubMed Central journal article supplement (PMC3711386)
Supplement: supp_13-11859_IOVS-13-11859-s01.pdf [file supp_13-11859_IOVS-13-11859-s01.pdf]

**Supplementary Figure 1. Conjunctival inflammation and scarring in ocular SJS/TEN.** Clinical photographs demonstrating mild conjunctival inflammation in the right eyes of individuals with severe cutaneous desquamation (Nikolsky's sign) in a patient requiring ventilator support in intensive care (A) acute (B) and chronic (C) ocular SJS-TEN. The individual with chronic disease has evidence of lower fornix foreshortening, nasal symblephara (arrowed) and extensive corneal neovascularisation (asterisk).

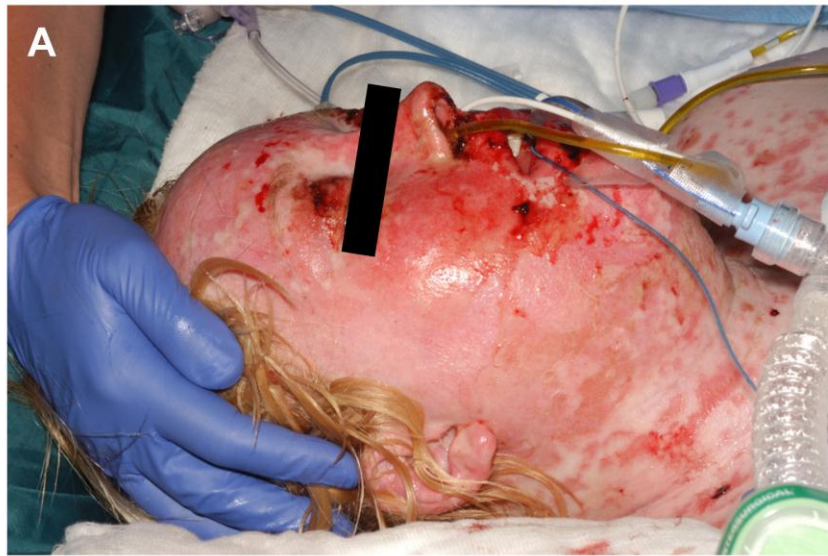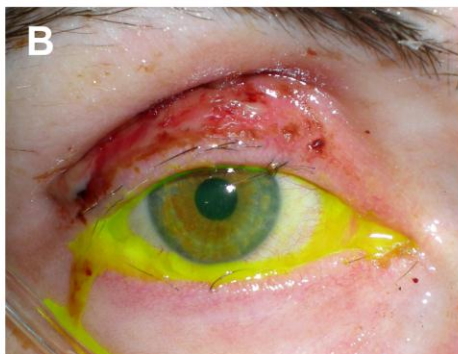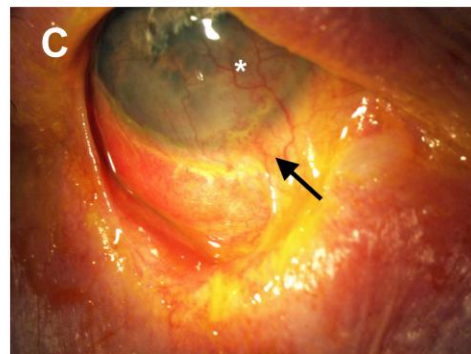

**Supplementary Table 1. Antibody panels used for cell surface staining.** For healthy volunteers and patients with SJS-TEN, commercially available mouse anti-human cell-surface fluorochrome-labelled monoclonal antibodies were employed in two panels and titrated to determine the optimal concentrations.

| <b>Panel 1 (T cells)</b>          |                      |                                      |
|-----------------------------------|----------------------|--------------------------------------|
| <b>Cell surface marker</b>        | <b>Fluorochrome</b>  | <b>Source</b>                        |
| CD45RO                            | FITC                 | Ebioscience, Hatfield, UK            |
| $\gamma\delta$ TCR                | Phycoerythrin, PE    | Ebioscience, Hatfield, UK            |
| CD4                               | PerCP Cy5.5          | Ebioscience, Hatfield, UK            |
| CD45                              | Allophycocyanin, APC | Ebioscience, Hatfield, UK            |
| CD3                               | AlexaFluor 780       | Ebioscience, Hatfield, UK            |
| CD8 $\alpha$                      | Pacific Orange       | Invitrogen, Paisley, UK              |
| CD8 $\beta$                       | PE Texas Red         | Beckman Coulter,<br>High Wycombe, UK |
| CD56                              | PE Cy7               | Biolegend, Cambridge, UK             |
| <b>Panel 2 (Other leukocytes)</b> |                      |                                      |
| <b>Cell surface marker</b>        | <b>Fluorochrome</b>  | <b>Source</b>                        |
| CD16                              | FITC                 | Ebioscience, Hatfield, UK            |
| CD138                             | PerCP Cy5.5          | BD, Oxford, UK                       |
| CD45                              | Allophycocyanin, APC | Ebioscience, Hatfield, UK            |
| CD14                              | AlexaFluor 780       | Ebioscience, Hatfield, UK            |
| CD20                              | Pacific Orange       | Invitrogen, Paisley, UK              |
| CD19                              | PE Texas Red         | Invitrogen, Paisley, UK              |
| CD11b                             | PE Cy7               | Biolegend, Cambridge, UK             |
